# Supplementary material for: An evaluation of the CMIP3 and CMIP5 simulations in their skill of simulating the spatial structure of SST variability
Source: Springer Nature journal article supplement (doi:10.1007/s00382-014-2154-0), 2014-05-08
Supplement: 382_2014_2154_MOESM2_ESM.pdf [file 382_2014_2154_MOESM2_ESM.pdf]

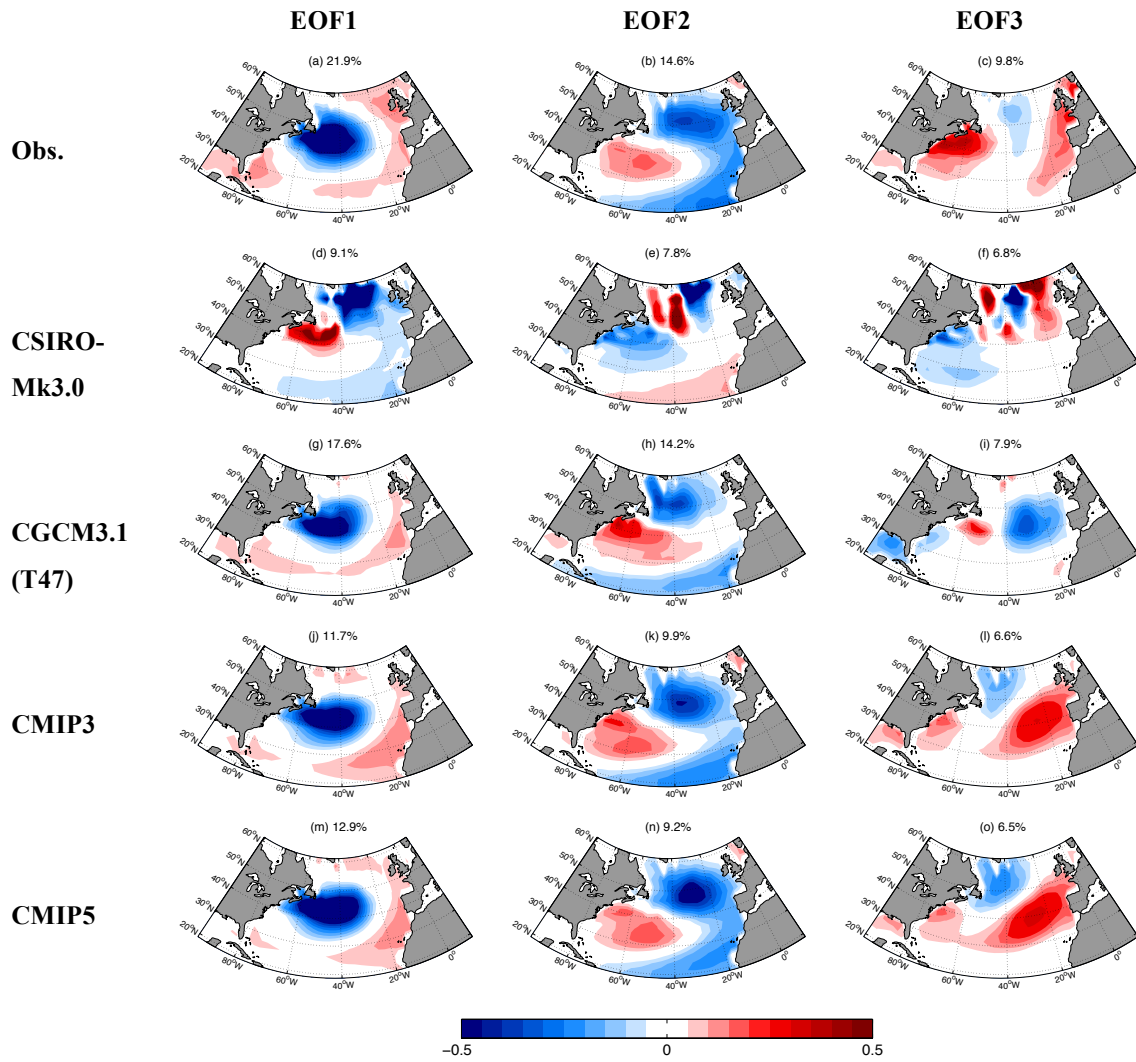

**Supplemental Fig. 2** First three leading EOF patterns, as in Fig. 10, but of high-pass SSTA in the North Atlantic for a selection of model simulations and observations. In addition to the observations, the CMIP3 and CMIP5 super models, the models with the largest (CSIRO-Mk3.0) and smallest (CGCM3.1 (T47))  $RMSE_{EOF}$  value are shown.
