# Supplementary material for: An evaluation of the CMIP3 and CMIP5 simulations in their skill of simulating the spatial structure of SST variability
Source: Springer Nature journal article supplement (doi:10.1007/s00382-014-2154-0), 2014-05-08
Supplement: 382_2014_2154_MOESM3_ESM.pdf [file 382_2014_2154_MOESM3_ESM.pdf]

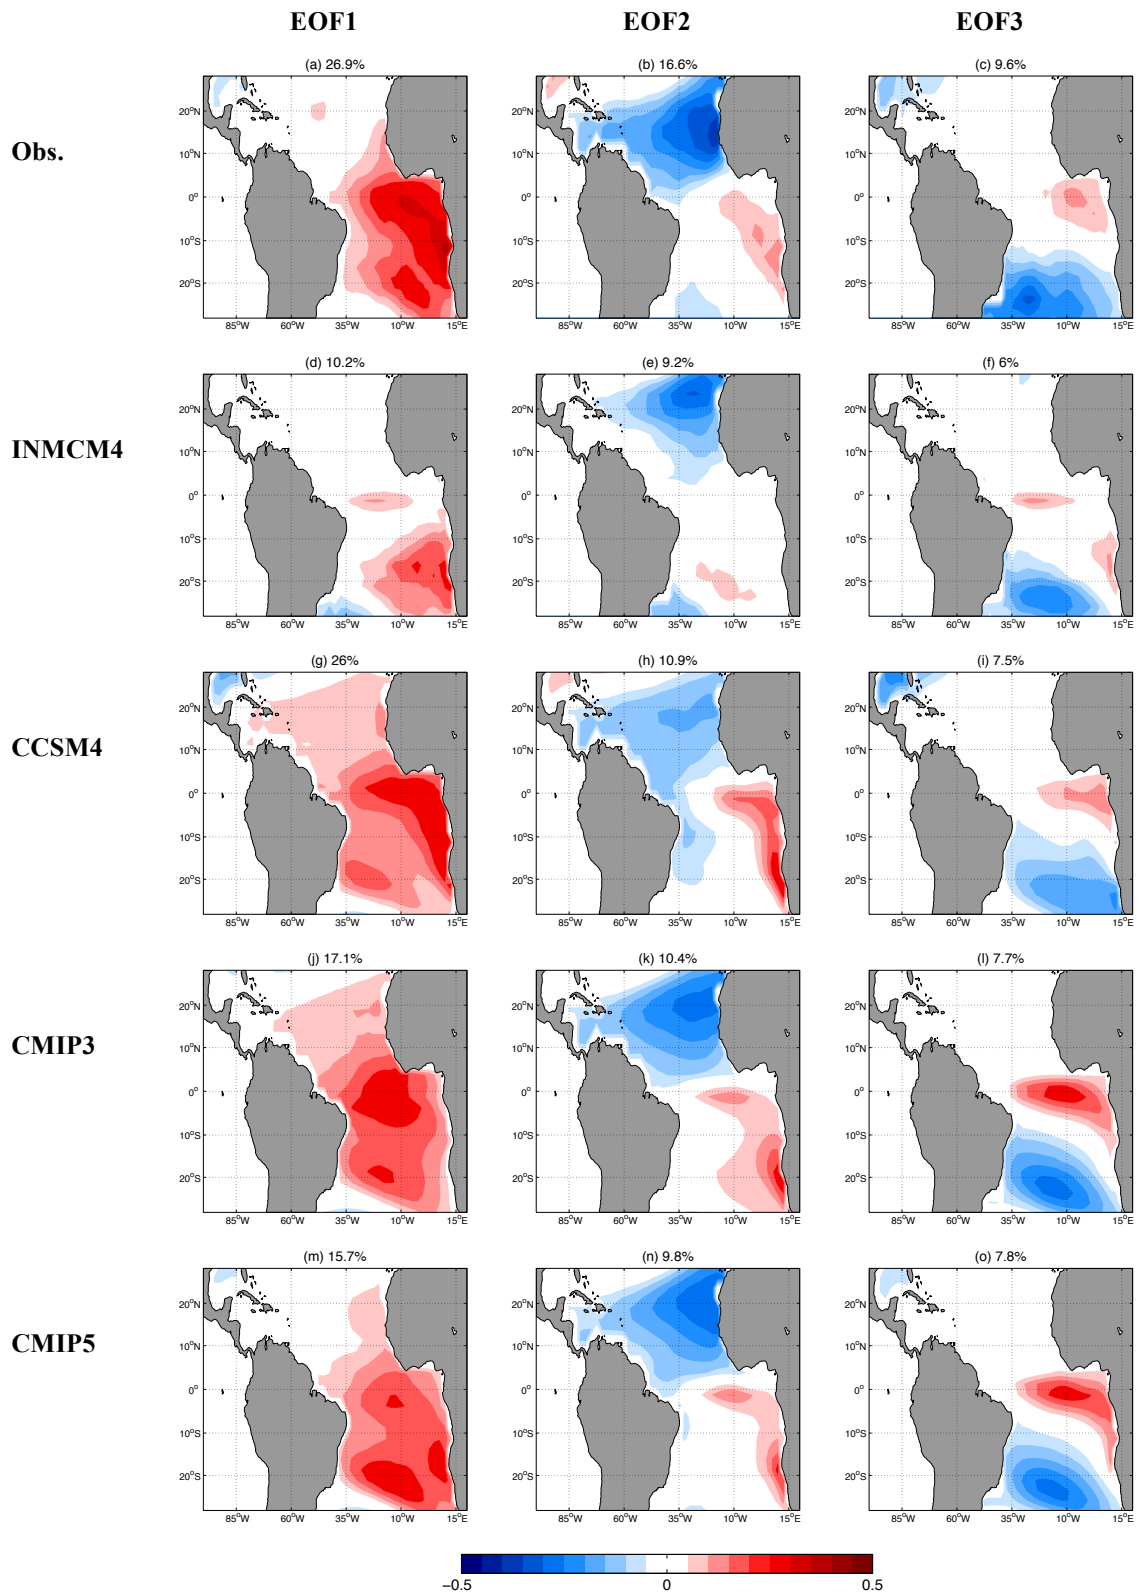

**Supplemental Fig. 3** First three leading EOF patterns, as in Fig. 10, but of high-pass SSTA in the Tropical Atlantic for a selection of model simulations and observations. In addition to the observations, the CMIP3 and CMIP5 super models, the models with the largest (INMCM4) and smallest (CCSM4) RMSE<sub>EOF</sub> value are shown.
