# Supplementary material for: An evaluation of the CMIP3 and CMIP5 simulations in their skill of simulating the spatial structure of SST variability
Source: Springer Nature journal article supplement (doi:10.1007/s00382-014-2154-0), 2014-05-08
Supplement: 382_2014_2154_MOESM5_ESM.pdf [file 382_2014_2154_MOESM5_ESM.pdf]

**Supplemental Table. 1**  $N_{\text{spatial}}$  values for all models as shown in Fig. 4.

| Model Name        | North Pacific |          | Tropical Indo-Pacific |          | North Atlantic |          | Tropical Atlantic |          | Southern Ocean |          |
|-------------------|---------------|----------|-----------------------|----------|----------------|----------|-------------------|----------|----------------|----------|
|                   | High-pass     | Low-pass | High-pass             | Low-pass | High-pass      | Low-pass | High-pass         | Low-pass | High-pass      | Low-pass |
| <b>CMIP3</b>      |               |          |                       |          |                |          |                   |          |                |          |
| BCCR-BCM2.0       | 19.9          | 4.1      | 15.8                  | 5.5      | 13.4           | 5.1      | 15.2              | 4.1      | 27.0           | 5.0      |
| CGCM3.1 (T47)     | 15.7          | 3.0      | 26.4                  | 3.2      | 13.9           | 4.2      | 14.9              | 2.5      | 24.0           | 6.3      |
| CGCM3.1 (T63)     | 18.2          | 3.7      | 28.4                  | 3.9      | 12.6           | 3.6      | 15.1              | 3.1      | 30.1           | 5.9      |
| CNRM-CM3          | 16.1          | 4.2      | 3.6                   | 4.4      | 14.3           | 5.1      | 8.8               | 3.4      | 29.6           | 6.4      |
| CSIRO-Mk3.0       | 18.6          | 5.7      | 9.7                   | 5.8      | 29.8           | 2.6      | 13.8              | 3.9      | 29.7           | 6.8      |
| CSIRO-Mk3.5       | 15.4          | 5.0      | 7.5                   | 4.6      | 18.6           | 4.5      | 11.6              | 4.0      | 20.8           | 8.7      |
| GFDL-CM2.0        | 22.7          | 3.2      | 8.6                   | 4.6      | 23.6           | 4.1      | 12.3              | 5.6      | 22.6           | 5.1      |
| GFDL-CM2.1        | 15.7          | 5.5      | 5.1                   | 5.0      | 16.4           | 4.7      | 9.8               | 4.1      | 16.3           | 8.3      |
| GISS-AOM          | 14.5          | 6.0      | 35.1                  | 6.7      | 12.2           | 4.6      | 11.8              | 4.2      | 33.5           | 10.0     |
| GISS-EH           | 22.5          | 5.4      | 38.1                  | 5.0      | 18.8           | 5.9      | 16.9              | 4.0      | 29.9           | 8.8      |
| GISS-ER           | 18.3          | 4.6      | 39.8                  | 7.5      | 15.6           | 4.6      | 14.1              | 3.9      | 19.6           | 6.6      |
| FGOALS-g1.0       | 7.0           | 3.5      | 1.9                   | 3.0      | 11.4           | 2.0      | 6.6               | 3.7      | 10.9           | 8.3      |
| INGV-SXG          | 13.6          | 4.0      | 9.9                   | 4.3      | 14.1           | 6.5      | 16.7              | 4.8      | 27.4           | 6.2      |
| INM-CM3.0         | 15.2          | 3.0      | 13.0                  | 3.5      | 17.9           | 6.3      | 12.3              | 4.5      | 41.2           | 5.0      |
| IPSL-CM4          | 12.3          | 3.2      | 6.0                   | 3.9      | 13.7           | 5.0      | 9.8               | 4.5      | 19.2           | 7.2      |
| MIROC3.2 (hires)  | 28.7          | 7.7      | 43.3                  | 5.2      | 19.0           | 5.9      | 15.0              | 3.9      | 35.9           | 11.6     |
| MIROC3.2 (medres) | 17.3          | 4.3      | 21.8                  | 4.6      | 16.4           | 5.1      | 12.1              | 4.2      | 12.8           | 7.4      |
| ECHAM5/MPI-OM     | 19.0          | 3.8      | 4.9                   | 3.7      | 27.8           | 9.8      | 11.0              | 5.0      | 43.5           | 11.6     |
| MRI-CGCM2.3.2     | 11.3          | 2.9      | 10.1                  | 3.9      | 9.3            | 3.3      | 9.7               | 4.3      | 26.0           | 8.6      |
| CCSM3             | 13.2          | 4.1      | 7.7                   | 7.4      | 19.4           | 2.9      | 16.1              | 5.7      | 22.6           | 7.3      |
| PCM               | 13.5          | 5.2      | 25.6                  | 6.9      | 24.0           | 5.2      | 22.2              | 7.2      | 34.9           | 9.6      |
| UKMO-HadCM3       | 25.6          | 5.3      | 10.3                  | 4.4      | 31.2           | 7.5      | 19.8              | 4.1      | 38.5           | 10.6     |
| UKMO-HadGEM1      | 27.8          | 7.6      | 38.7                  | 5.8      | 19.8           | 5.8      | 21.1              | 3.9      | 25.5           | 10.0     |
| <b>CMIP5</b>      |               |          |                       |          |                |          |                   |          |                |          |
| ACCESS1.0         | 18.2          | 6.1      | 13.3                  | 6.8      | 18.0           | 4.3      | 17.1              | 4.3      | 22.1           | 11.2     |
| BCC-CSM1.1        | 19.8          | 4.7      | 19.9                  | 6.7      | 22.7           | 5.9      | 14.8              | 4.5      | 18.1           | 4.8      |
| CCSM4             | 12.1          | 4.5      | 5.4                   | 4.9      | 12.5           | 4.2      | 9.9               | 3.7      | 18.7           | 5.3      |
| CNRM-CM5          | 18.1          | 5.3      | 9.8                   | 5.9      | 15.2           | 4.4      | 14.2              | 4.7      | 22.8           | 6.7      |
| CanESM2           | 15.9          | 3.6      | 5.7                   | 4.0      | 18.8           | 4.5      | 12.5              | 3.9      | 21.3           | 6.8      |
| GFDL-CM3          | 14.5          | 5.2      | 7.3                   | 4.5      | 16.4           | 4.5      | 11.5              | 3.4      | 16.6           | 4.4      |
| GFDL-ESM2G        | 23.9          | 4.2      | 19.2                  | 5.1      | 17.7           | 2.4      | 16.1              | 4.6      | 23.6           | 9.4      |
| GFDL-ESM2M        | 17.2          | 4.3      | 6.3                   | 4.6      | 16.9           | 4.7      | 11.1              | 5.0      | 18.4           | 6.9      |
| GISS-E2-H         | 13.5          | 5.5      | 14.1                  | 8.9      | 12.2           | 5.9      | 13.5              | 3.0      | 22.5           | 10.9     |
| GISS-E2-R         | 17.0          | 5.7      | 13.3                  | 6.0      | 12.7           | 6.2      | 13.4              | 4.7      | 19.2           | 7.1      |
| HadCM3            | 29.4          | 4.6      | 14.4                  | 4.2      | 32.0           | 5.6      | 20.2              | 5.7      | 36.5           | 5.7      |
| HadGEM2-CC        | 24.4          | 5.0      | 18.8                  | 4.6      | 18.5           | 4.3      | 21.1              | 4.4      | 24.7           | 8.3      |
| HadGEM2-ES        | 24.2          | 6.5      | 27.9                  | 4.3      | 19.2           | 4.4      | 22.4              | 5.2      | 26.5           | 9.4      |
| INM-CM4           | 22.6          | 4.8      | 22.7                  | 4.9      | 32.0           | 7.1      | 26.6              | 6.2      | 52.1           | 9.4      |
| IPSL-CM5A-LR      | 16.3          | 4.2      | 20.7                  | 3.9      | 13.6           | 3.9      | 11.7              | 3.3      | 18.5           | 4.2      |
| IPSL-CM5A-MR      | 16.6          | 2.9      | 15.5                  | 3.8      | 13.2           | 5.8      | 12.8              | 4.5      | 17.2           | 8.0      |
| IPSL-CM5B-LR      | 16.4          | 4.1      | 17.7                  | 5.7      | 13.4           | 4.5      | 13.3              | 3.4      | 26.6           | 9.4      |
| MIROC5            | 12.3          | 5.4      | 7.4                   | 3.5      | 14.9           | 4.8      | 10.4              | 4.7      | 23.2           | 7.7      |
| MPI-ESM-LR        | 26.1          | 6.2      | 21.5                  | 3.1      | 30.7           | 8.8      | 20.0              | 5.0      | 53.2           | 14.8     |
| MPI-ESM-P         | 24.5          | 4.9      | 17.4                  | 4.6      | 28.9           | 7.3      | 18.8              | 5.2      | 51.2           | 11.2     |
| MRI-CGCM3         | 17.2          | 6.6      | 22.4                  | 5.9      | 22.2           | 6.3      | 18.5              | 5.4      | 22.0           | 9.7      |
| NorESM1-M         | 12.3          | 4.2      | 6.7                   | 4.1      | 14.1           | 4.7      | 15.0              | 3.7      | 22.9           | 8.4      |
| NorESM1-ME        | 13.2          | 4.3      | 7.7                   | 5.4      | 14.6           | 4.9      | 12.5              | 4.3      | 22.6           | 6.3      |
