# Supplementary material for: An evaluation of the CMIP3 and CMIP5 simulations in their skill of simulating the spatial structure of SST variability
Source: Springer Nature journal article supplement (doi:10.1007/s00382-014-2154-0), 2014-05-08
Supplement: 382_2014_2154_MOESM6_ESM.pdf [file 382_2014_2154_MOESM6_ESM.pdf]

**Supplemental Table. 2** RMSE<sub>EOF</sub> values relative to the observations as shown in Fig. 9 for all models.

| Model Name        | North Pacific |          | Tropical Indo-Pacific |          | North Atlantic |          | Tropical Atlantic |          | Southern Ocean |          | Global Summary |          |
|-------------------|---------------|----------|-----------------------|----------|----------------|----------|-------------------|----------|----------------|----------|----------------|----------|
|                   | High-pass     | Low-pass | High-pass             | Low-pass | High-pass      | Low-pass | High-pass         | Low-pass | High-pass      | Low-pass | High-pass      | Low-pass |
| <b>CMIP3</b>      |               |          |                       |          |                |          |                   |          |                |          |                |          |
| BCCR-BCM2.0       | 53.6          | 75.7     | 52.4                  | 52.2     | 38.5           | 71.6     | 42.6              | 37.0     | 43.4           | 78.1     | 46.1           | 62.9     |
| CGCM3.1 (T47)     | 32.8          | 39.2     | 68.4                  | 31.5     | 26.9           | 40.2     | 45.2              | 16.5     | 54.0           | 70.1     | 45.5           | 39.5     |
| CGCM3.1 (T63)     | 37.8          | 42.9     | 69.0                  | 41.4     | 26.2           | 54.6     | 42.3              | 18.7     | 55.3           | 66.4     | 46.1           | 44.8     |
| CNRM-CM3          | 39.1          | 42.4     | 19.3                  | 43.0     | 36.7           | 43.7     | 30.4              | 23.4     | 51.8           | 82.6     | 35.4           | 47.0     |
| CSIRO-Mk3.0       | 43.6          | 62.4     | 43.9                  | 48.6     | 73.5           | 65.5     | 41.6              | 30.3     | 38.7           | 81.0     | 48.3           | 57.6     |
| CSIRO-Mk3.5       | 35.9          | 57.4     | 31.5                  | 35.9     | 53.2           | 74.0     | 34.7              | 29.0     | 36.0           | 71.3     | 38.2           | 53.5     |
| GFDL-CM2.0        | 45.2          | 66.8     | 28.9                  | 34.2     | 57.9           | 77.1     | 33.3              | 42.8     | 48.2           | 78.0     | 42.7           | 59.8     |
| GFDL-CM2.1        | 32.0          | 63.0     | 17.1                  | 49.8     | 39.0           | 59.0     | 27.0              | 29.4     | 40.4           | 75.3     | 31.1           | 55.3     |
| GISS-AOM          | 39.8          | 54.5     | 88.4                  | 73.0     | 35.5           | 49.9     | 54.6              | 45.6     | 61.0           | 80.1     | 55.9           | 60.6     |
| GISS-EH           | 50.3          | 86.8     | 76.0                  | 53.1     | 49.8           | 73.5     | 53.3              | 39.4     | 42.8           | 82.4     | 54.4           | 67.1     |
| GISS-ER           | 46.2          | 69.8     | 83.2                  | 68.8     | 45.0           | 69.2     | 45.7              | 30.6     | 45.6           | 82.8     | 53.1           | 64.3     |
| FGOALS-g1.0       | 35.8          | 65.6     | 42.9                  | 33.4     | 29.8           | 30.4     | 32.6              | 26.7     | 43.8           | 74.2     | 37.0           | 46.1     |
| INGV-SXG          | 24.5          | 29.9     | 32.5                  | 33.8     | 38.3           | 61.1     | 43.8              | 37.7     | 40.8           | 71.5     | 36.0           | 46.8     |
| INM-CM3.0         | 38.8          | 62.5     | 60.0                  | 43.9     | 47.9           | 54.7     | 40.0              | 39.1     | 51.9           | 72.2     | 47.7           | 54.5     |
| IPSL-CM4          | 31.0          | 50.9     | 19.8                  | 34.1     | 32.9           | 64.4     | 25.1              | 34.2     | 46.9           | 82.0     | 31.1           | 53.1     |
| MIROC3.2 (hires)  | 47.7          | 76.5     | 79.3                  | 45.7     | 38.1           | 59.1     | 38.0              | 23.0     | 52.5           | 80.6     | 51.1           | 57.0     |
| MIROC3.2 (medres) | 37.4          | 41.6     | 65.4                  | 45.5     | 39.4           | 61.9     | 29.3              | 20.4     | 37.5           | 80.7     | 41.8           | 50.0     |
| ECHAM5/MPI-OM     | 38.2          | 45.8     | 13.5                  | 31.8     | 55.1           | 77.1     | 33.1              | 42.8     | 52.5           | 81.9     | 38.5           | 55.9     |
| MRI-CGCM2.3.2     | 19.6          | 26.1     | 35.9                  | 35.0     | 22.1           | 59.2     | 24.6              | 37.6     | 46.5           | 69.7     | 29.8           | 45.5     |
| CCSM3             | 26.3          | 40.6     | 32.0                  | 56.2     | 46.2           | 66.6     | 43.4              | 39.0     | 40.8           | 73.8     | 37.7           | 55.2     |
| PCM               | 24.0          | 49.1     | 62.1                  | 57.5     | 52.1           | 67.2     | 56.8              | 51.7     | 49.6           | 83.5     | 48.9           | 61.8     |
| UKMO-HadCM3       | 55.4          | 39.3     | 39.3                  | 39.0     | 55.8           | 70.0     | 49.6              | 52.8     | 49.6           | 82.8     | 50.0           | 56.7     |
| UKMO-HadGEM1      | 51.0          | 61.4     | 71.6                  | 45.9     | 41.8           | 55.4     | 51.6              | 46.6     | 37.9           | 81.3     | 50.8           | 58.1     |
| <b>CMIP5</b>      |               |          |                       |          |                |          |                   |          |                |          |                |          |
| ACCESS1.0         | 35.2          | 69.9     | 40.7                  | 58.0     | 39.4           | 59.8     | 42.9              | 25.4     | 38.9           | 81.9     | 39.4           | 59.0     |
| BCC-CSM1.1        | 39.1          | 55.9     | 56.7                  | 61.0     | 55.4           | 75.8     | 42.0              | 31.0     | 33.1           | 72.2     | 45.2           | 59.2     |
| CCSM4             | 17.7          | 45.2     | 12.8                  | 44.4     | 21.5           | 46.4     | 24.4              | 25.3     | 32.7           | 67.6     | 21.8           | 45.8     |
| CNRM-CM5          | 37.5          | 51.6     | 31.7                  | 42.7     | 33.4           | 57.8     | 38.2              | 30.6     | 34.8           | 83.3     | 35.1           | 53.2     |
| CanESM2           | 29.7          | 26.6     | 21.8                  | 34.0     | 45.4           | 59.5     | 38.1              | 27.2     | 37.6           | 69.4     | 34.5           | 43.3     |
| GFDL-CM3          | 24.8          | 59.3     | 22.9                  | 45.6     | 42.4           | 62.6     | 29.0              | 20.4     | 37.7           | 62.7     | 31.4           | 50.1     |
| GFDL-ESM2G        | 45.1          | 48.0     | 55.3                  | 44.6     | 39.1           | 30.2     | 40.6              | 26.7     | 44.5           | 80.0     | 44.9           | 45.9     |
| GFDL-ESM2M        | 35.3          | 58.1     | 19.8                  | 47.0     | 45.5           | 81.9     | 41.0              | 43.3     | 39.7           | 78.4     | 36.2           | 61.7     |
| GISS-E2-H         | 30.9          | 68.2     | 49.8                  | 67.4     | 29.8           | 55.7     | 46.2              | 19.6     | 38.9           | 81.0     | 39.1           | 58.4     |
| GISS-E2-R         | 37.4          | 52.1     | 43.9                  | 49.9     | 22.4           | 66.5     | 48.7              | 37.8     | 41.2           | 76.5     | 38.7           | 56.5     |
| HadCM3            | 58.1          | 68.8     | 50.3                  | 37.7     | 55.5           | 59.0     | 52.9              | 39.1     | 47.7           | 74.8     | 52.9           | 55.9     |
| HadGEM2-CC        | 43.5          | 58.8     | 50.7                  | 33.5     | 38.8           | 42.6     | 50.9              | 24.9     | 35.5           | 74.3     | 43.9           | 46.8     |
| HadGEM2-ES        | 44.5          | 60.2     | 62.1                  | 32.1     | 40.0           | 57.6     | 53.0              | 42.1     | 38.2           | 74.8     | 47.6           | 53.3     |
| INM-CM4           | 46.4          | 63.7     | 63.7                  | 47.2     | 56.7           | 71.8     | 62.9              | 52.9     | 63.4           | 78.4     | 58.6           | 62.8     |
| IPSL-CM5A-LR      | 32.1          | 37.1     | 57.2                  | 35.7     | 27.2           | 52.4     | 38.3              | 19.0     | 43.8           | 62.9     | 39.7           | 41.4     |
| IPSL-CM5A-MR      | 31.8          | 18.0     | 49.1                  | 30.0     | 30.6           | 55.2     | 41.4              | 31.5     | 32.5           | 78.2     | 37.1           | 42.6     |
| IPSL-CM5B-LR      | 39.1          | 47.6     | 50.8                  | 51.2     | 28.9           | 60.5     | 46.8              | 31.6     | 46.7           | 84.8     | 42.5           | 55.1     |
| MIROC5            | 24.2          | 47.4     | 21.2                  | 29.9     | 34.2           | 54.5     | 26.4              | 33.6     | 35.8           | 77.9     | 28.4           | 48.7     |
| MPI-ESM-LR        | 50.6          | 68.4     | 56.6                  | 25.0     | 56.8           | 69.7     | 49.4              | 34.0     | 57.5           | 86.9     | 54.2           | 56.8     |
| MPI-ESM-P         | 47.1          | 66.7     | 51.2                  | 39.2     | 53.9           | 73.4     | 45.7              | 40.0     | 55.2           | 79.4     | 50.6           | 59.7     |
| MRI-CGCM3         | 33.7          | 63.1     | 59.0                  | 43.8     | 58.5           | 60.3     | 49.8              | 35.2     | 38.6           | 79.2     | 47.9           | 56.3     |
| NorESM1-M         | 25.3          | 46.3     | 21.2                  | 33.6     | 29.3           | 44.0     | 45.3              | 21.2     | 37.5           | 77.0     | 31.7           | 44.4     |
| NorESM1-ME        | 29.6          | 54.3     | 25.1                  | 41.1     | 32.1           | 65.0     | 39.0              | 32.9     | 37.9           | 68.5     | 32.7           | 52.3     |
