# Supplementary material for: An evaluation of the CMIP3 and CMIP5 simulations in their skill of simulating the spatial structure of SST variability
Source: Springer Nature journal article supplement (doi:10.1007/s00382-014-2154-0), 2014-05-08
Supplement: 382_2014_2154_MOESM7_ESM.pdf [file 382_2014_2154_MOESM7_ESM.pdf]

**Supplemental Table. 3** RMSE<sub>EOF</sub> values of the pairwise model comparison as shown in Fig. 11.

| Model Name        | North Pacific |          | Tropical Indo-Pacific |          | North Atlantic |          | Tropical Atlantic |          | Southern Ocean |          | Global Summary |          |
|-------------------|---------------|----------|-----------------------|----------|----------------|----------|-------------------|----------|----------------|----------|----------------|----------|
|                   | High-pass     | Low-pass | High-pass             | Low-pass | High-pass      | Low-pass | High-pass         | Low-pass | High-pass      | Low-pass | High-pass      | Low-pass |
| <b>CMIP3</b>      |               |          |                       |          |                |          |                   |          |                |          |                |          |
| BCCR-BCM2.0       | 41.3          | 60.7     | 34.7                  | 47.8     | 29.7           | 66.3     | 27.2              | 32.4     | 41.2           | 65.7     | 34.8           | 54.6     |
| CGCM3.1 (T47)     | 26.1          | 39.4     | 52.3                  | 30.8     | 23.9           | 52.2     | 29.7              | 31.8     | 34.9           | 55.5     | 33.4           | 42.0     |
| CGCM3.1 (T63)     | 29.5          | 49.1     | 53.5                  | 32.8     | 27.3           | 51.5     | 28.8              | 27.3     | 41.8           | 56.3     | 36.2           | 43.4     |
| CNRM-CM3          | 31.2          | 48.6     | 74.6                  | 33.7     | 29.6           | 60.4     | 27.1              | 26.2     | 50.1           | 74.2     | 42.5           | 48.6     |
| CSIRO-Mk3.0       | 31.2          | 59.4     | 34.1                  | 41.5     | 62.4           | 65.1     | 30.9              | 46.2     | 40.8           | 71.0     | 39.9           | 56.6     |
| CSIRO-Mk3.5       | 28.0          | 48.6     | 37.1                  | 33.9     | 40.8           | 67.3     | 25.3              | 29.3     | 46.0           | 67.0     | 35.4           | 49.2     |
| GFDL-CM2.0        | 34.4          | 56.6     | 35.7                  | 36.7     | 44.6           | 68.0     | 26.8              | 54.8     | 35.5           | 61.0     | 35.4           | 55.4     |
| GFDL-CM2.1        | 22.7          | 51.0     | 56.8                  | 41.9     | 28.6           | 55.3     | 25.9              | 28.6     | 26.5           | 62.6     | 32.1           | 47.9     |
| GISS-AOM          | 28.1          | 59.8     | 77.7                  | 63.1     | 29.1           | 62.6     | 38.5              | 40.9     | 54.5           | 72.1     | 45.6           | 59.7     |
| GISS-EH           | 37.6          | 76.9     | 58.9                  | 41.8     | 39.5           | 71.5     | 35.8              | 36.2     | 40.6           | 75.8     | 42.5           | 60.4     |
| GISS-ER           | 31.9          | 63.7     | 72.9                  | 63.4     | 33.8           | 67.1     | 30.7              | 29.2     | 33.2           | 73.9     | 40.5           | 59.5     |
| FGOALS-g1.0       | 41.6          | 54.2     | 129.4                 | 29.9     | 29.8           | 57.7     | 35.8              | 30.8     | 35.1           | 63.0     | 54.3           | 47.1     |
| INGV-SXG          | 24.9          | 48.2     | 35.5                  | 32.8     | 32.4           | 67.5     | 29.0              | 33.8     | 48.8           | 60.0     | 34.1           | 48.5     |
| INM-CM3.0         | 28.3          | 51.8     | 37.5                  | 36.3     | 39.7           | 65.1     | 31.2              | 38.1     | 51.4           | 64.3     | 37.6           | 51.1     |
| IPSL-CM4          | 29.2          | 62.3     | 46.3                  | 29.6     | 26.2           | 55.9     | 27.7              | 44.0     | 42.2           | 72.4     | 34.3           | 52.8     |
| MIROC3.2 (hires)  | 38.0          | 72.9     | 65.4                  | 41.1     | 29.6           | 53.2     | 30.7              | 26.8     | 43.4           | 73.7     | 41.5           | 53.5     |
| MIROC3.2 (medres) | 28.6          | 45.9     | 46.6                  | 39.9     | 28.6           | 61.0     | 24.6              | 30.3     | 34.0           | 65.6     | 32.5           | 48.5     |
| ECHAM5/MPI-OM     | 28.6          | 46.0     | 58.6                  | 30.3     | 43.9           | 73.7     | 28.4              | 39.6     | 49.3           | 76.9     | 41.8           | 53.3     |
| MRI-CGCM2.3.2     | 26.2          | 44.8     | 31.7                  | 35.1     | 29.7           | 54.2     | 28.4              | 35.8     | 42.0           | 63.9     | 31.6           | 46.8     |
| CCSM3             | 27.7          | 51.3     | 39.5                  | 50.1     | 35.7           | 58.4     | 29.8              | 37.7     | 37.3           | 64.4     | 34.0           | 52.4     |
| PCM               | 28.1          | 55.3     | 44.6                  | 47.1     | 39.7           | 69.5     | 39.9              | 49.8     | 44.2           | 74.2     | 39.3           | 59.2     |
| UKMO-HadCM3       | 42.2          | 52.3     | 34.8                  | 35.9     | 46.9           | 64.2     | 34.8              | 49.3     | 48.5           | 72.0     | 41.5           | 54.8     |
| UKMO-HadGEM1      | 39.9          | 63.8     | 56.0                  | 42.1     | 33.4           | 57.3     | 36.6              | 46.1     | 38.9           | 71.9     | 41.0           | 56.2     |
| <b>CMIP5</b>      |               |          |                       |          |                |          |                   |          |                |          |                |          |
| ACCESS1.0         | 26.9          | 64.3     | 35.7                  | 53.2     | 33.0           | 59.5     | 30.3              | 29.6     | 30.1           | 71.7     | 31.2           | 55.7     |
| BCC-CSM1.1        | 31.3          | 54.3     | 40.7                  | 49.4     | 44.6           | 71.1     | 29.9              | 31.8     | 26.3           | 56.8     | 34.6           | 52.7     |
| CCSM4             | 23.5          | 45.6     | 51.0                  | 37.7     | 23.9           | 49.9     | 27.1              | 28.6     | 44.4           | 54.6     | 34.0           | 43.3     |
| CNRM-CM5          | 27.3          | 51.1     | 35.3                  | 40.4     | 25.7           | 50.9     | 26.7              | 37.1     | 30.5           | 64.8     | 29.1           | 48.9     |
| CanESM2           | 23.0          | 39.1     | 48.6                  | 28.6     | 36.1           | 57.1     | 27.0              | 29.2     | 32.1           | 59.7     | 33.4           | 42.7     |
| GFDL-CM3          | 21.9          | 54.6     | 41.8                  | 35.4     | 31.4           | 59.1     | 25.0              | 25.8     | 25.8           | 54.8     | 29.2           | 45.9     |
| GFDL-ESM2G        | 34.8          | 45.7     | 38.5                  | 35.6     | 30.1           | 50.2     | 26.8              | 29.9     | 31.2           | 69.6     | 32.3           | 46.2     |
| GFDL-ESM2M        | 25.8          | 45.3     | 47.0                  | 40.3     | 33.1           | 66.7     | 29.2              | 36.9     | 27.8           | 66.3     | 32.6           | 51.1     |
| GISS-E2-H         | 25.7          | 58.4     | 33.6                  | 56.5     | 25.5           | 61.7     | 32.0              | 29.3     | 38.9           | 72.5     | 31.2           | 55.7     |
| GISS-E2-R         | 28.8          | 55.2     | 32.9                  | 43.5     | 23.2           | 61.7     | 33.8              | 36.3     | 26.9           | 64.3     | 29.2           | 52.2     |
| HadCM3            | 45.2          | 59.7     | 34.9                  | 33.6     | 46.9           | 57.3     | 35.5              | 42.0     | 45.9           | 65.5     | 41.7           | 51.6     |
| HadGEM2-CC        | 32.4          | 54.3     | 39.3                  | 34.9     | 31.1           | 50.1     | 35.4              | 39.4     | 33.4           | 61.9     | 34.3           | 48.1     |
| HadGEM2-ES        | 33.4          | 56.9     | 47.2                  | 32.9     | 31.1           | 52.6     | 39.2              | 40.7     | 35.1           | 67.3     | 37.2           | 50.1     |
| INM-CM4           | 34.8          | 52.9     | 43.9                  | 44.1     | 48.9           | 63.6     | 47.9              | 50.2     | 61.5           | 73.0     | 47.4           | 56.8     |
| IPSL-CM5A-LR      | 24.7          | 49.4     | 39.1                  | 30.1     | 23.4           | 50.2     | 29.6              | 25.1     | 37.3           | 62.6     | 30.8           | 43.5     |
| IPSL-CM5A-MR      | 24.2          | 43.1     | 34.6                  | 28.3     | 25.0           | 56.2     | 27.9              | 33.9     | 27.9           | 68.5     | 27.9           | 46.0     |
| IPSL-CM5B-LR      | 31.0          | 63.7     | 38.7                  | 43.8     | 24.2           | 62.8     | 35.3              | 40.5     | 41.9           | 74.2     | 34.2           | 57.0     |
| MIROC5            | 25.7          | 58.2     | 39.7                  | 31.4     | 25.7           | 54.1     | 23.0              | 33.4     | 32.3           | 63.0     | 29.3           | 48.0     |
| MPI-ESM-LR        | 39.5          | 61.5     | 39.2                  | 31.1     | 45.8           | 72.3     | 33.9              | 32.2     | 54.7           | 81.3     | 42.6           | 55.7     |
| MPI-ESM-P         | 35.3          | 52.6     | 34.9                  | 34.5     | 43.3           | 65.9     | 32.1              | 36.8     | 53.4           | 76.1     | 39.8           | 53.2     |
| MRI-CGCM3         | 27.0          | 59.9     | 41.8                  | 42.3     | 47.3           | 59.2     | 34.9              | 42.6     | 32.2           | 68.2     | 36.6           | 54.5     |
| NorESM1-M         | 24.6          | 49.0     | 41.7                  | 31.7     | 23.9           | 61.1     | 32.0              | 26.0     | 40.1           | 65.0     | 32.5           | 46.5     |
| NorESM1-ME        | 25.9          | 49.7     | 40.5                  | 39.8     | 27.0           | 61.6     | 32.4              | 31.8     | 43.4           | 58.3     | 33.8           | 48.2     |
